# Supplementary material for: Janus Porous Polylactic Acid Membranes with Versatile Metal-Phenolic Interface for Biomimetic Periodontal Bone Regeneration
Source: Research Square preprint supplement (doi:10.21203/rs.3.rs-2478312/v1), 2023-02-08
Supplement: Supplementary file 1 [file ef3a989833bf99ec2238426f.docx]

**Supplementary Information for**

**Janus Porous Polylactic Acid Membranes with Versatile Metal-Phenolic Interface for Biomimetic Periodontal Bone Regeneration**

Yaping Zhang 1, 2, #, Yi Chen 1, #, Tian Ding 1, Yandi Zhang 1, Daiwei Yang 1, Yajun Zhao 1, Jin Liu 1, Baojin Ma 1, Alberto Bianco 3, Shaohua Ge 1, *, Jianhua Li 1, *

*1. Department of Biomaterials, School and Hospital of Stomatology, Cheeloo College of Medicine, Shandong University & Shandong Key Laboratory of Oral Tissue Regeneration & Shandong Engineering Laboratory for Dental Materials and Oral Tissue Regeneration & Shandong Provincial Clinical Research Center for Oral Diseases, Jinan 250012, China*

*2. Department of Orthodontics, The First Affiliated Hospital of Zhengzhou University, (Stomatological Hospital of Henan Province), Zhengzhou 450052, China*

*3. CNRS, Immunology, Immunopathology and Therapeutic Chemistry, UPR 3572, University of Strasbourg, ISIS, 67000 Strasbourg, France*

# First authors:These authors contributed equally to this work.

*Corresponding Authors:

Jianhua Li

E-mail: jianhua.li@sdu.edu.cn

Shaohua Ge

E-mail: shaohuage@sdu.edu.cn

**Figure**


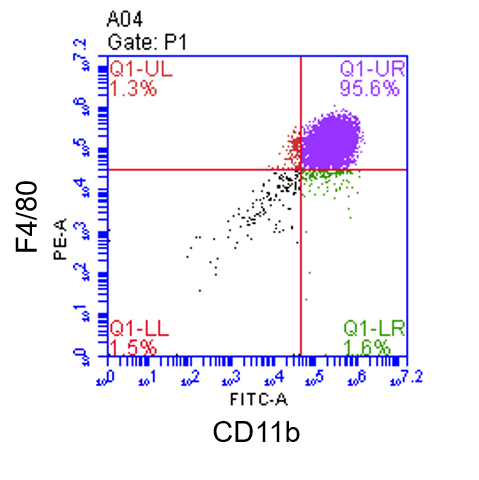


**Figure S1.** Purity identification of primary BMDMs.


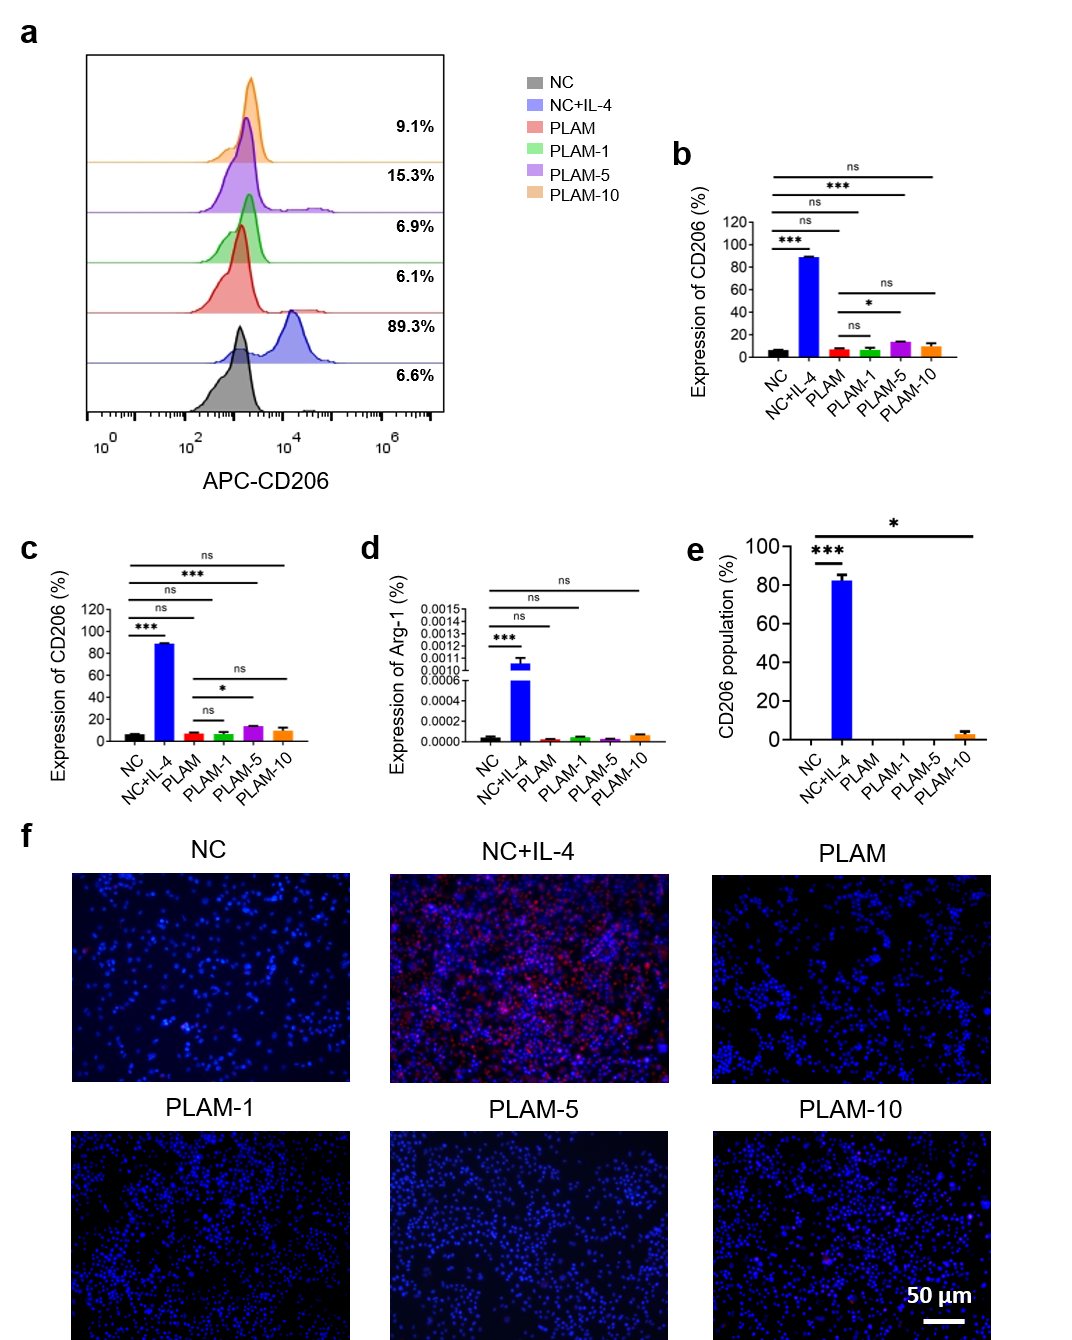


**Figure S2.** Immune regulation of macrophages on the scaffolds. a, b) Flow cytometry assay and quantitative analysis of CD206 in BMDMs. d, e) Relative mRNA expressions of CD206 and Arg-1 in BMDMs. e, f) Representative immunofluorescent staining images and quantitative analysis of CD206 in BMDMs. ***P* < 0.01 and ****P* < 0.001.


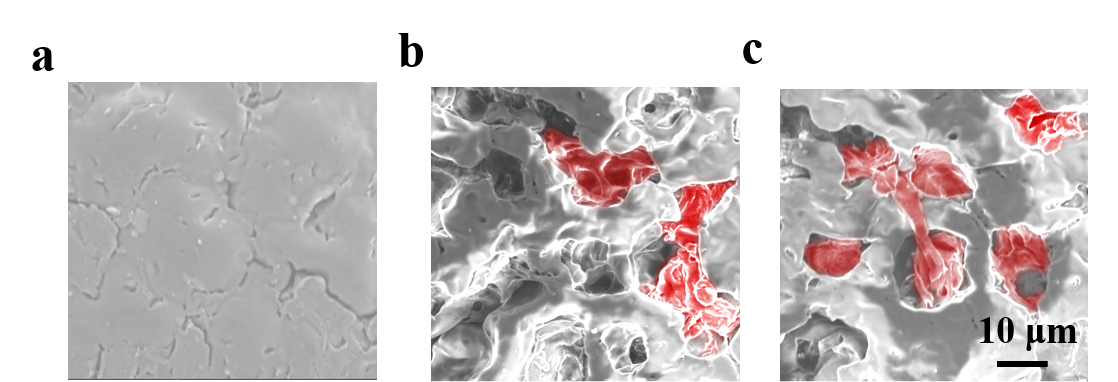


**Figure S3.** Evaluation of the barrier function of PLAM-MPN scaffolds. SEM image of the scaffolds' surface near the defect at 8 w after surgery. a) PLAM-B surface. b) PLAM-P. c) PLAM-10 surface.

**Table S1** Primer sequences were used for PCR in the present study.

| Gene | Forward primer (5'~3') | Reverse primer (5'~3') |
| --- | --- | --- |
| *GAPDH* | TGTCTCCTGCGACTTCAACA | GGTGGTCCAGGGTTTCTTACT |
| *iNOS* | CCTGCTTTGTGCGAAGTGTC | CCCAAACACCAAGCTCATGC |
| *TNF-α* | CGGGCAGGTCTACTTTGGAG | ACCCTGAGCCATAATCCCCT |
| *Arg-1* | TGTCCCTAATGACAGCTCCTT | GCATCCACCCAAATGACACAT |
| *CD206* | ACCTGGGGACCTGGTTGTAT | CTCGCGTCCAATAGCTGAAC |
| *VEGF* | CTTGCAGATGTGACAAGCCG | GTCGATGGTGATGGTGTGGT |
| *HIF* | GGCAGCAACGACACAGAAAC | TTTTCGTTGGGTGAGGGGAG |
| *SCF* | GACCTTGTGGAGTGCGTGAA | CTGGGTTCTGGGCTCTTGAAT |
| *ALP* | GGCGGTGAACGAGAGAATGT | GGACGTAGTTCTGCTCGTGG |
| *RUNX2* | GGAGTGGACGAGGCAAGAGT | AGGCGGTCAGAGAACAAACT |
| *OPN* | GCCGTGGGAAGGACAGTTAT | ATCTGGACTGCTTGTGGCTG |
